# Supplementary material
Source: publisher site journal article supplement (https://www.dovepress.com/article/532710)
Supplement: Supplementary file 1 [file 532710_AGS_Survey_SulcusTech_RevisedSupplemental_071025_1.docx]

**Supplemental Table 1a** Demographics and Tube Placement Preferences

| Category | Details | Value (Percentage) |
| --- | --- | --- |
| Respondents | Total Respondents | 121 |
| Years of experience | 0-5 years | 33 (28%) |
|  | 6-10 years | 27 (23%) |
| 11-20 years | 32 (27%) |
| 21-30 years | 22 (18%) |
| 31-50 years | 6 (5%) |
| Percentage of tubes placed in AC in pseudophakic patients | 0-20% | 33 (27%) |
| 21-40% | 12 (10%) |
| 41-60% | 10 (8%) |
| 61-80% | 23 (19%) |
| 81-100% | 43 (36%) |
| Percentage of tubes placed in sulcus in pseudophakic patients | 0-20% | 51 (42%) |
| 21-40% | 16 (13%) |
| 41-60% | 11 (9%) |
| 61-80% | 11 (9%) |
| 81-100% | 32 (26%) |

**Supplemental Table 1b** Importance of reasons for selection of AC over sulcus placement

|  | Not at all | Slightly | Moderately | Very | Extremely |
| --- | --- | --- | --- | --- | --- |
| Familiarity | 12 (9.9%) | 20 (16.5%) | 20 (16.5%) | 35 (28.9%) | 34 (28.1%) |
| Safety | 7 (5.8%) | 9 (7.4%) | 30 (24.8%) | 50 (41.3%) | 25 (20.7%) |
| Efficiency | 9 (7.4%) | 14 (11.6%) | 23 (19.0%) | 42 (34.7%) | 33 (27.3%) |
| Limited evidence of inferiority of AC | 21 (17.6%) | 25 (21.0%) | 28 (23.5%) | 27 (22.7%) | 18 (15.1%) |
| No sulcus insertion technology | 42 (35.3%) | 26 (21.8%) | 22 (18.5%) | 15 (12.6%) | 14 (11.8%) |

**Supplemental Table 1c** Features of a sulcus tube insertion technology in terms of importance to adoption

|  | Not important | Slightly important | Moderately important | Very important | Extremely important |
| --- | --- | --- | --- | --- | --- |
| Effectively lower IOP | 9 (7.6%) | 6 (5.0%) | 17 (14.3%) | 41 (34.5%) | 46 (38.7%) |
| Accuracy | 1 (0.8%) | 1 (0.8%) | 14 (11.7%) | 36 (30.0%) | 68 (56.7%) |
| Affordability | 7 (5.8%) | 8 (6.7%) | 25 (20.8%) | 40 (33.3%) | 40 (33.3%) |
| Ease of use | 1 (0.8%) | 2 (1.7%) | 14 (11.7%) | 50 (41.7%) | 53 (44.2%) |
| Time Efficient | 0 (0.0%) | 8 (6.7%) | 27 (22.5%) | 52 (43.3%) | 33 (27.5%) |

**Supplemental Table 1d** Maximum acceptable additional cost for sulcus tube insertion technology

|  | Respondents |
| --- | --- |
| $0 | 13 (10.8%) |
| $1-$5 | 10 (8.3%) |
| $6-$10 | 27 (22.5%) |
| $11-$49 | 39 (32.5%) |
| More than $50 | 31 (25.8%) |

**Supplemental Figure 1:** Survey Questions distributed via Qualtrics

***Section 1:***

| 1. In which country do you practice? (drop down menu) |
| --- |
| 1. Did you complete a glaucoma fellowship? (single choice, yes/no) |
| 1. How many years have you been in practice? (single choice, year ranges: 0-5, 6-10, 11-20, 21-30, 31-50, more than 50) |
| 1. How many years have you been performing tube shunt surgery? (single choice, year ranges: 0-5, 6-10, 11-20, 21-30, 31-50, more than 50) |
| 1. How many tube shunt surgeries do you perform per month? (single choice, ranges: 0-5, 6-10, 11-20, 21-30, 31-50, more than 50) |
| 1. In your current practice, what percentage of tubes are placed in the anterior chamber for pseudophakic patients? (single choice, ranges: 0-20%, 21-40%, 41-60%, 61-80%, 81-100%) |
| 1. In your current practice, what percentage of tubes are placed in the sulcus for pseudophakic patients? (single choice, ranges: 0-20%, 21-40%, 41-60%, 61-80%, 81-100%)) |

***Section 2: Receptiveness to Sulcus Tube Placement***

| 1. How would you rate the importance of the following reasons for selecting AC over sulcus tube placement? (Matrix table: not at all important, slightly important, moderately important, very important, extremely important)  - Familiarity with AC placement - Safety of AC placement - Efficiency of AC placement - Limited evidence suggesting inferiority of AC placement - No specifically designed sulcus tube insertion technology |
| --- |
| 1. If a randomized controlled trial (RCT) demonstrated the superiority of sulcus over AC tube placement for endothelial cell loss (ECL), rate each of the following as a continued barrier to adoption of sulcus tube placement. (Matrix table: strongly disagree, somewhat disagree, neither agree nor disagree, somewhat agree, strongly agree)  - Unfamiliarity with sulcus placement - Technical difficulty of sulcus placement - Increased surgical time - Risk of vitreous loss and tube occlusion - Concern regarding intraocular bleeding - Concern regarding iris complications |
| 1. Assume a randomized controlled trial (RCT) demonstrated the superiority of sulcus over AC tube placement for endothelial cell loss (ECL). If a sulcus tube insertion technology was available that would allow for more efficient, consistent, and accurate sulcus tube placement, what is the likelihood of you routinely placing tubes in the sulcus (single choice)  - Extremely unlikely - Somewhat unlikely - Neither likely nor unlikely - Somewhat likely - Extremely likely |
| 1. Please rate the following features of a sulcus tube insertion technology in terms of importance to adoption. (Matrix table: not at all important, slightly important, moderately important, very important, extremely important)  - Effectiveness at lowering IOP - Accuracy of sulcus tube placement - Affordability - Ease of use - Surgical time-efficiency |
| 1. What is the maximum additional costthat would be acceptable for a sulcus tube insertion technology: (single choice)  - $0 (no additional cost is acceptable) - $1-$5 - $6-$10 - $11-$50 - More than $50 |
